# Supplementary material
Source: Springer Nature journal article supplement (https://www.springermedizin.de/resource/supplementary/12913_2009_1143_MOESM1_ESM.pdf/9528348)
Supplement: MOESM1 [file 9528348]

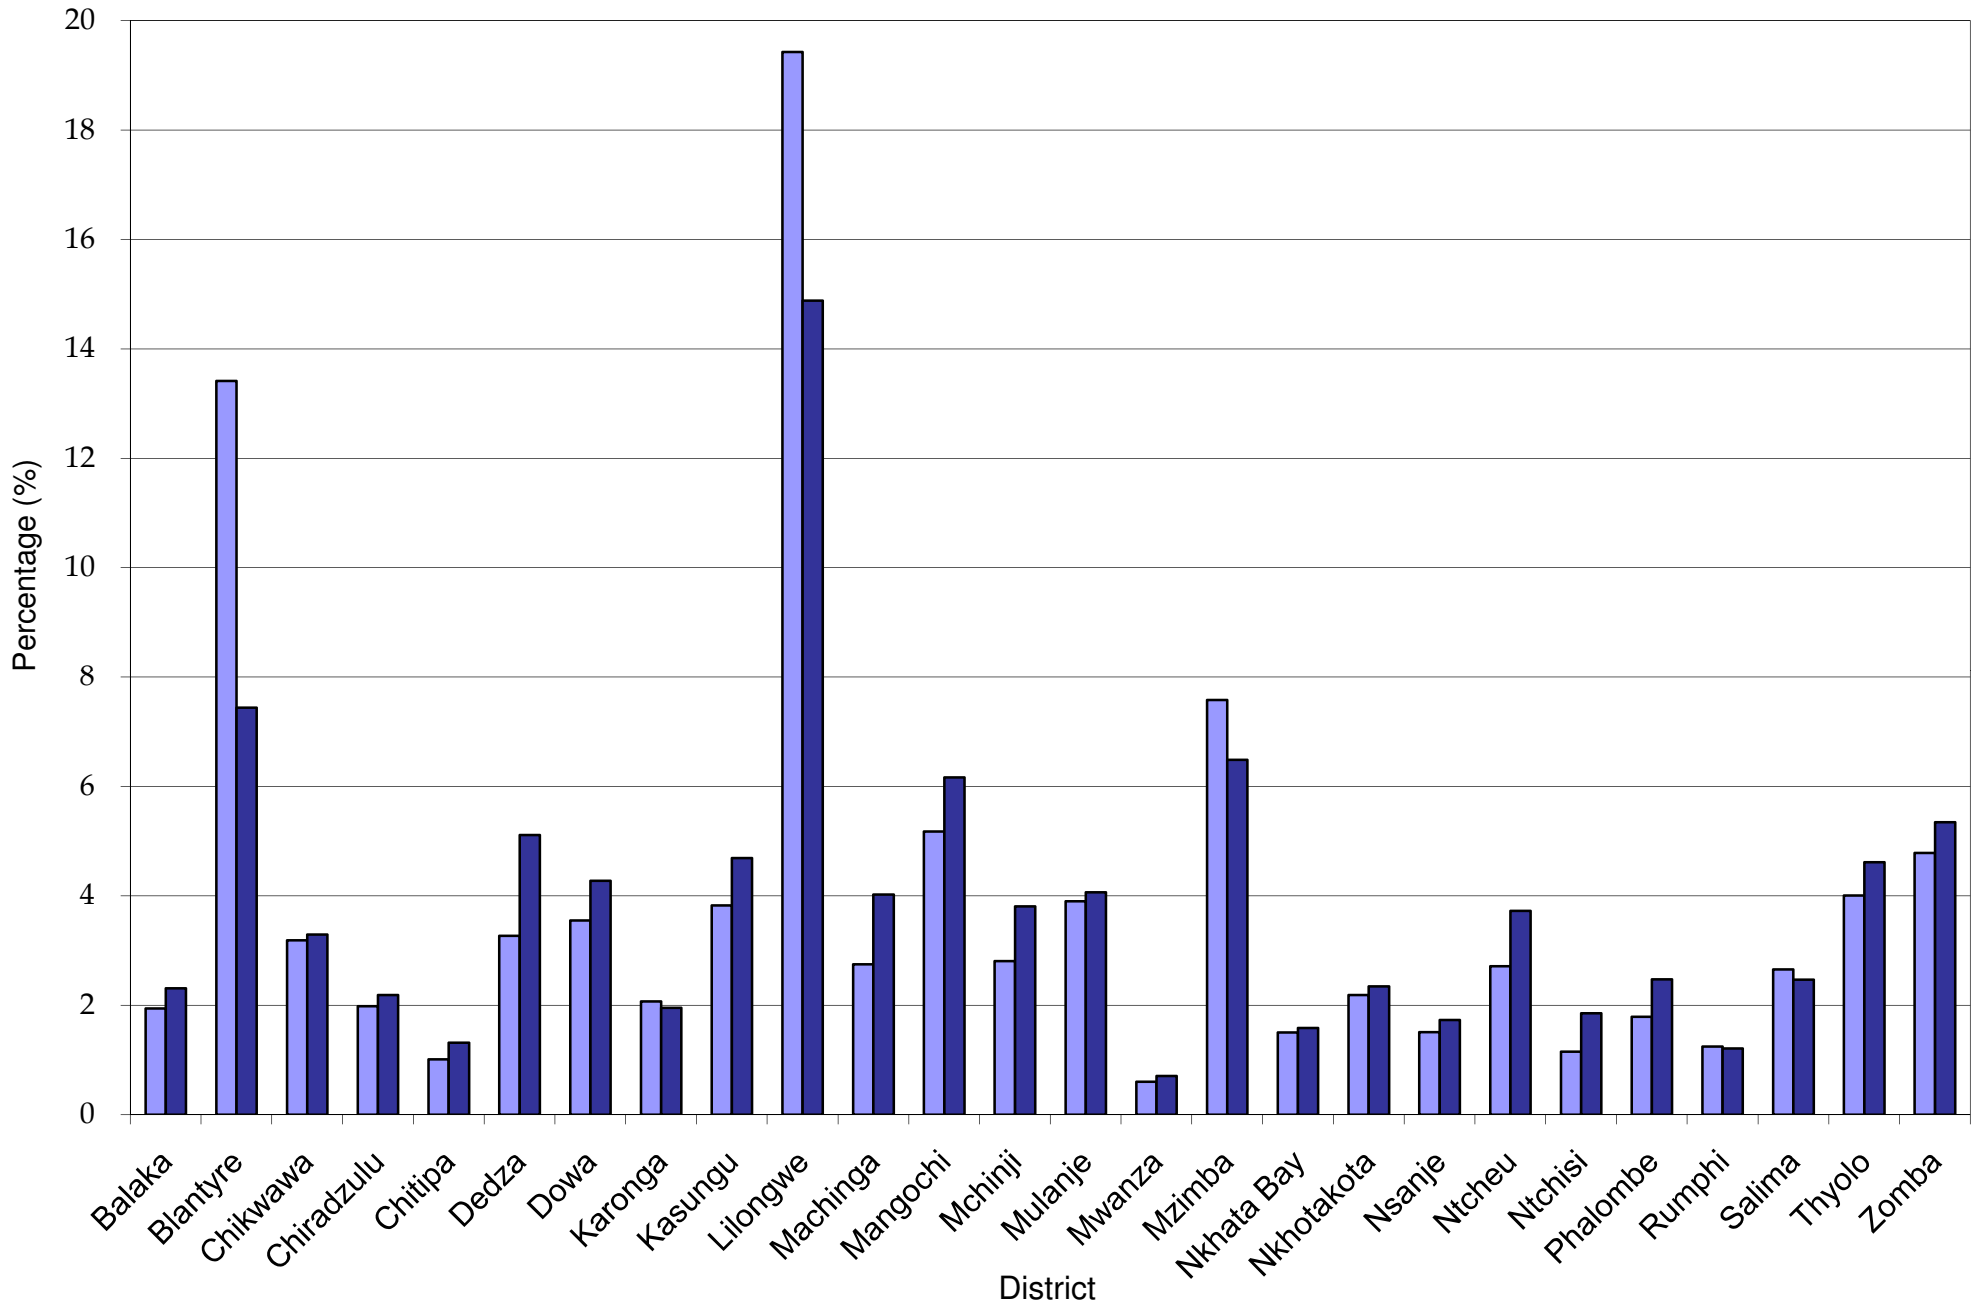

■ Proportion of population weighted by composite indicator (%)
 ■ Proportion of population weighted by simple indicator (%)
